# Supplementary material for: Peptide probes derived from pertuzumab by molecular dynamics modeling for HER2 positive tumor imaging
Source: PubMed Central journal article supplement (PMC5390981; doi:10.1371/journal.pcbi.1005441), 2017-04-13
Supplement: pcbi.1005441.s001.pdf [file pcbi.1005441.s001.pdf]

|        |                      |
|--------|----------------------|
| 4665   | EWVADVNPNSGGSIYNQRFK |
| 58F    | EWVADVNPNSGGFIYNQRFK |
| 63Y    | EWVADVNPNSGGSIYNQYFK |
| 55V    | EWVADVNPNVGGSIYNQRFK |
| 58F63Y | EWVADVNPNSGGFIYNQYFK |
| 55V63Y | EWVADVNPNVGGSIYNQYFK |

**S1 Fig.** Alignment of the sequences of the wild type and the five mutant peptides by Clustal Omega.
