# Supplementary material for: Peptide probes derived from pertuzumab by molecular dynamics modeling for HER2 positive tumor imaging
Source: PubMed Central journal article supplement (PMC5390981; doi:10.1371/journal.pcbi.1005441), 2017-04-13
Supplement: pcbi.1005441.s003.pdf [file pcbi.1005441.s003.pdf]

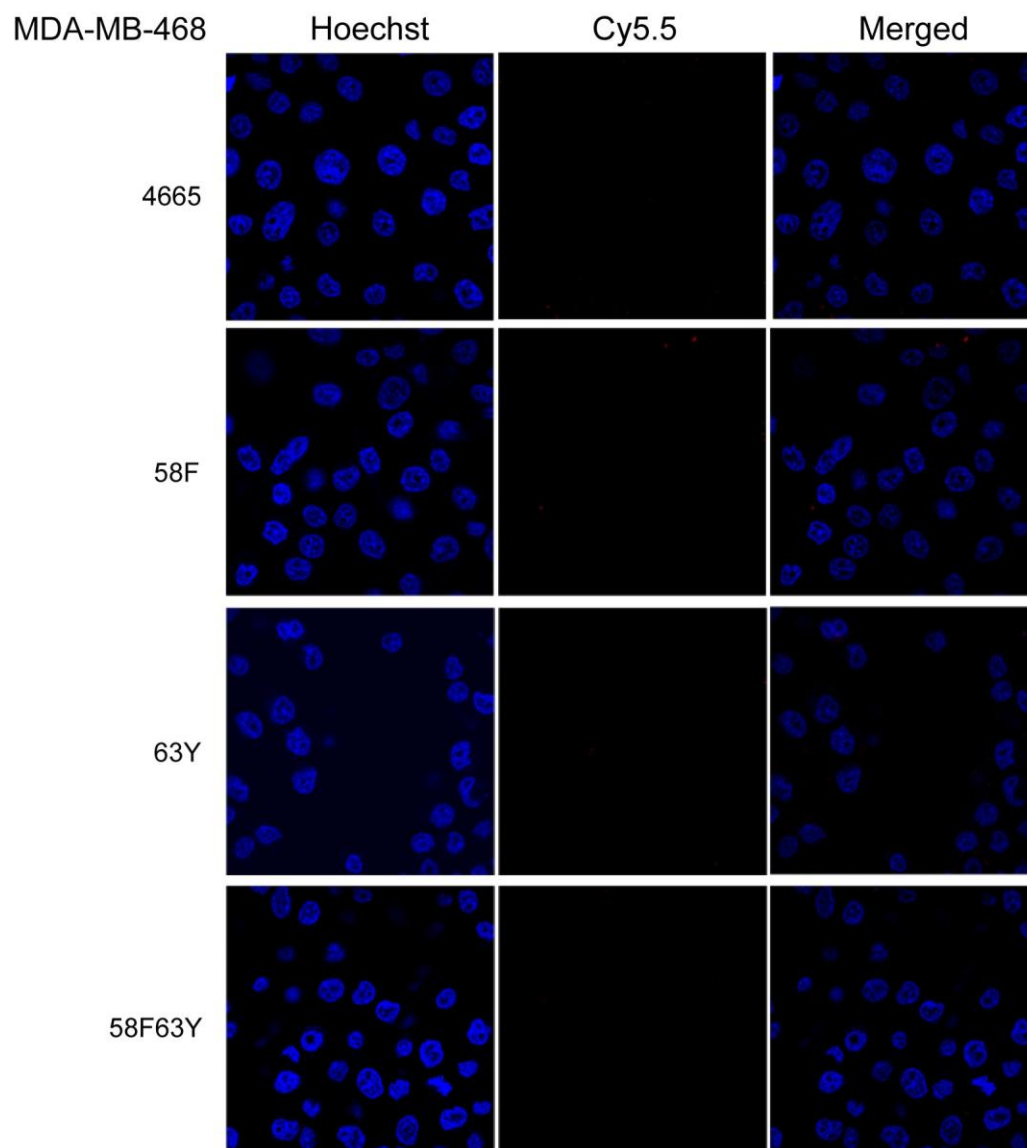

**S3 Fig. Confocal fluorescence imaging analysis of the MDA-MB-468 cell line with low HER2 expression after incubating with peptides labeled with Cy5.5.**
