# Supplementary material for: Peptide probes derived from pertuzumab by molecular dynamics modeling for HER2 positive tumor imaging
Source: PubMed Central journal article supplement (PMC5390981; doi:10.1371/journal.pcbi.1005441), 2017-04-13
Supplement: pcbi.1005441.s004.pdf [file pcbi.1005441.s004.pdf]

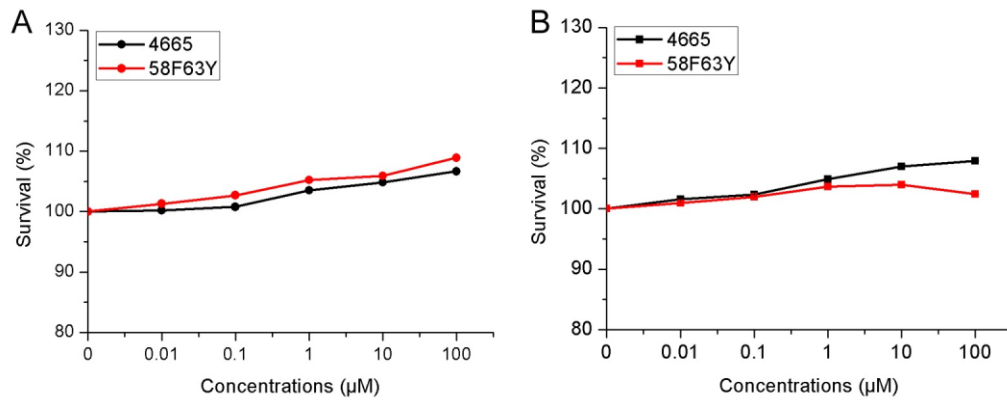

**S4 Fig. Toxicity of the peptides to HUVEC (A) and SKBR3 (B).** 4665 and 58F63Y shows no toxicity to both cell lines.
