# Supplementary material for: Peptide probes derived from pertuzumab by molecular dynamics modeling for HER2 positive tumor imaging
Source: PubMed Central journal article supplement (PMC5390981; doi:10.1371/journal.pcbi.1005441), 2017-04-13
Supplement: pcbi.1005441.s006.pdf [file pcbi.1005441.s006.pdf]

A HER2/4665

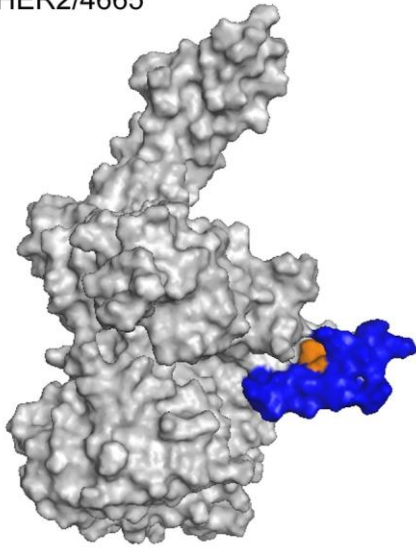

B HER2/58F

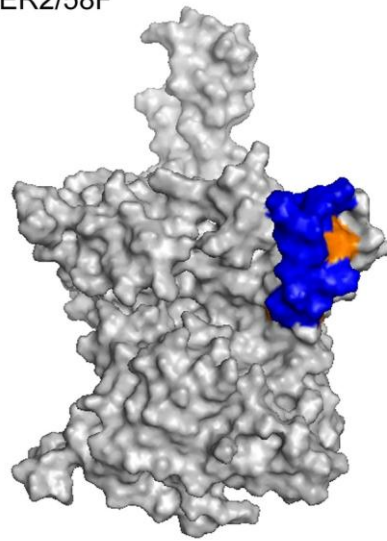

C HER2/63Y

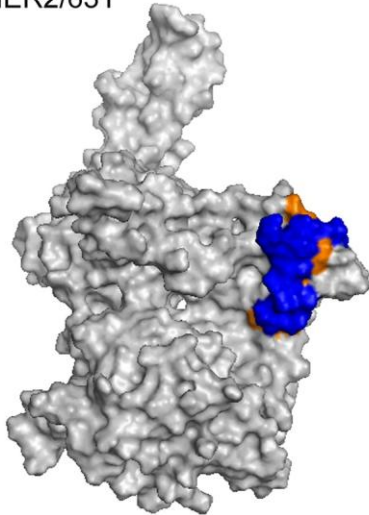

D HER2/55V

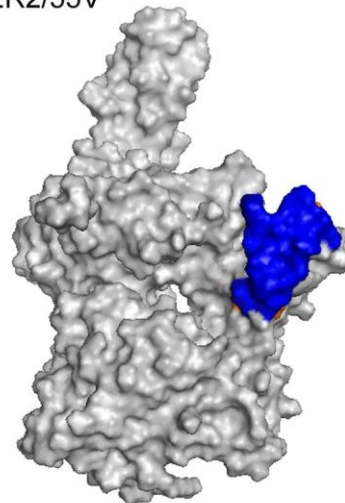

E HER2/58F63Y

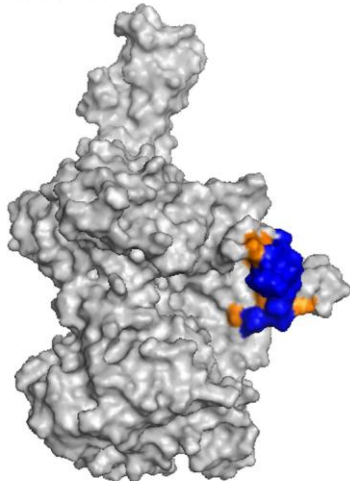

F HER2/55V63Y

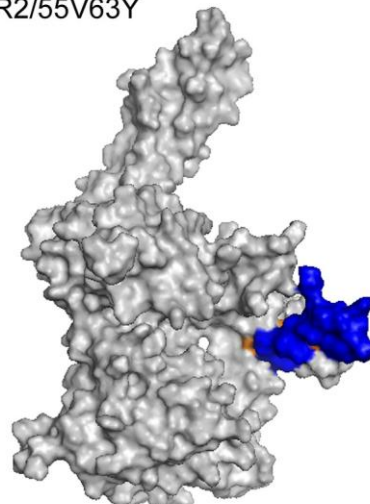

**S6 Fig. Comparison of the interactions of HER2/peptides.** HER2/4665 (A), HER2/58F (B), HER2/63Y (C), HER2/55V (D), HER2/58F63Y (E), and HER2/55V63Y (F). Gray cartoons are the HER2 protein, and blue cartoons are the

mutant peptides. Orange spots show the main contributing residues of each peptide interacting with HER2 protein.
