# Supplementary material for: Peptide probes derived from pertuzumab by molecular dynamics modeling for HER2 positive tumor imaging
Source: PubMed Central journal article supplement (PMC5390981; doi:10.1371/journal.pcbi.1005441), 2017-04-13
Supplement: pcbi.1005441.s007.pdf [file pcbi.1005441.s007.pdf]

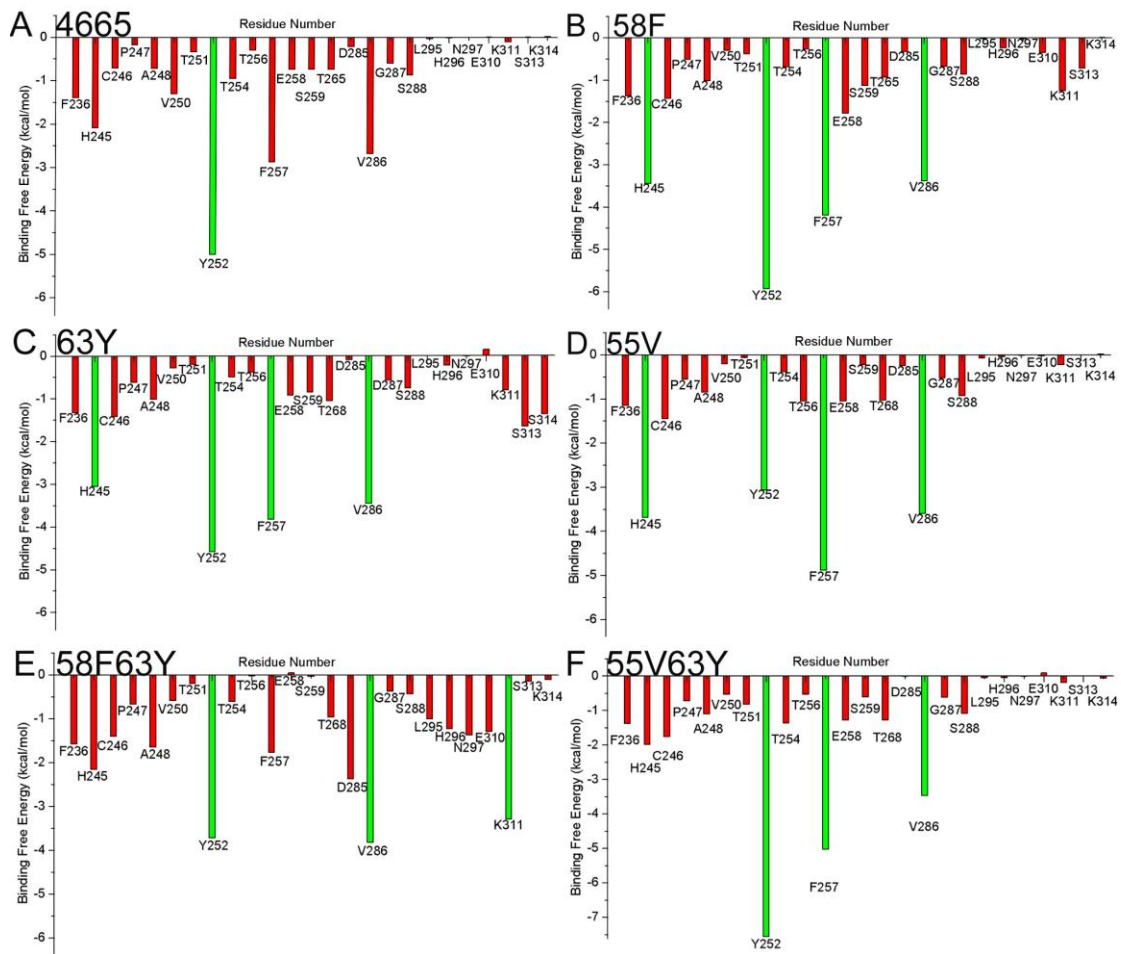

**S7 Fig. Binding free energy decomposition for key residues of the HER2 protein in the six complexes.** HER2/4665 (A), HER2/58F (B), HER2/63Y (C), HER2/55V (D), HER2/58F63Y (E), and HER2/55V63Y (F). Green bars in the figure represent binding free energy  $<-3$  kcal/mol. Therefore, each mutant shown in B to F has more than three residues that contribute to the HER2/peptide complexes.
