# Supplementary material for: Peptide probes derived from pertuzumab by molecular dynamics modeling for HER2 positive tumor imaging
Source: PubMed Central journal article supplement (PMC5390981; doi:10.1371/journal.pcbi.1005441), 2017-04-13
Supplement: pcbi.1005441.s008.pdf [file pcbi.1005441.s008.pdf]

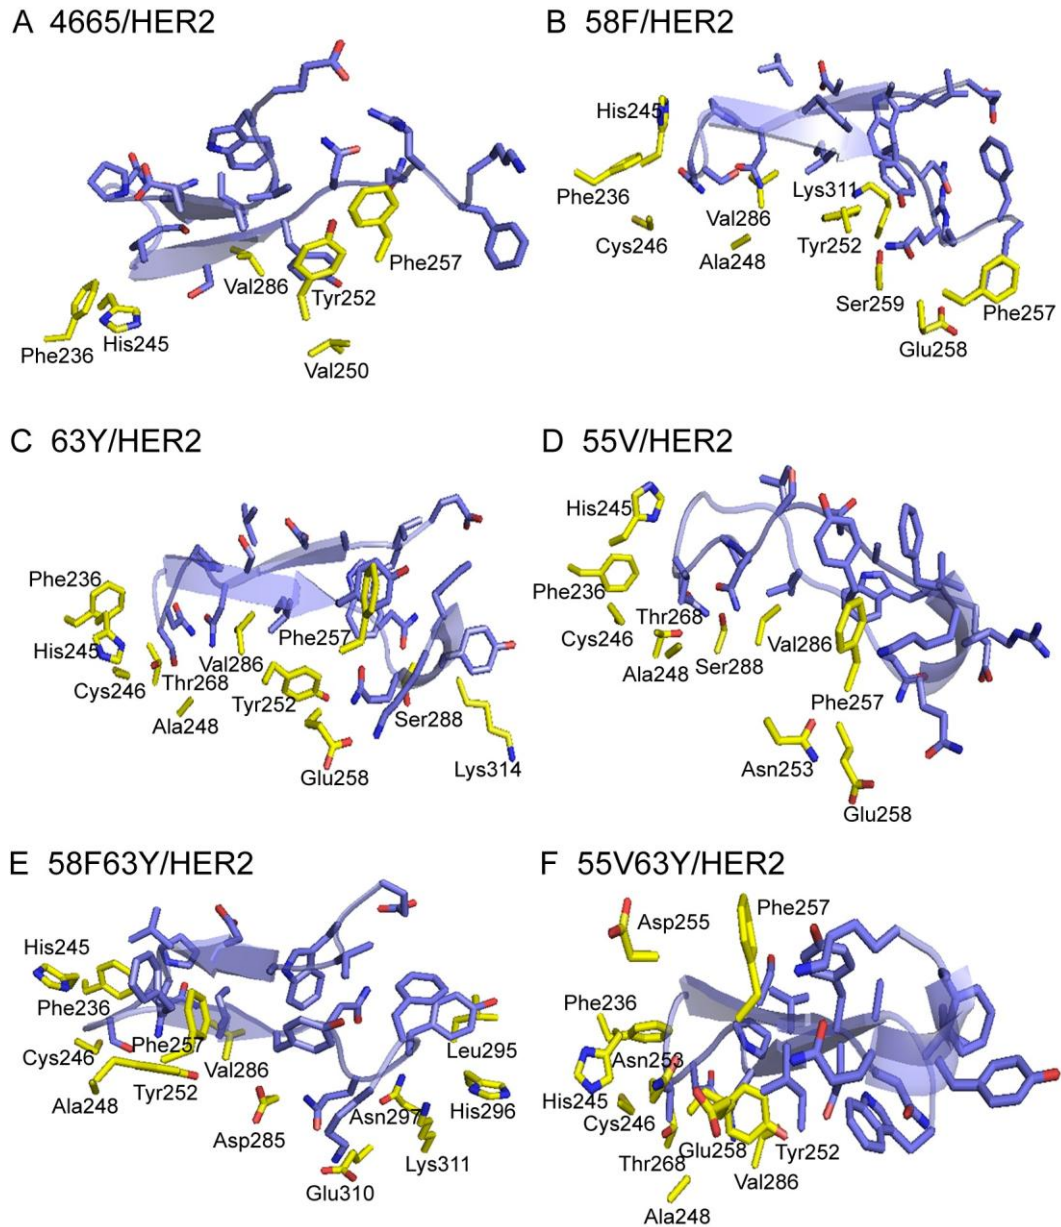

**S8 Fig. Binding models of HER2/peptides complexes:** 4665/HER2 (A), 58F/HER2 (B), 63Y4665/HER2 (C), 55V/HER2 (D), 58F63Y/HER2 (E), and 55V63Y/HER2 (F). Blue cartoons stand for mutant peptides. Key residues (binding free energy  $<-1$  kcal/mol) in HER2 protein are shown as yellow sticks.
