# Supplementary material for: Peptide probes derived from pertuzumab by molecular dynamics modeling for HER2 positive tumor imaging
Source: PubMed Central journal article supplement (PMC5390981; doi:10.1371/journal.pcbi.1005441), 2017-04-13
Supplement: pcbi.1005441.s009.pdf [file pcbi.1005441.s009.pdf]

**S1 Table. Numbers of water molecules and Na<sup>+</sup> ions added in all simulation systems.**

|                  | <b>Water molecule</b> | <b>Na<sup>+</sup></b> |
|------------------|-----------------------|-----------------------|
| <b>HER2/4665</b> | 37422                 | 13                    |
| <b>HER2/48F</b>  | 37418                 | 13                    |
| <b>HER2/48M</b>  | 37419                 | 13                    |
| <b>HER2/48W</b>  | 37420                 | 13                    |
| <b>HER2/48Y</b>  | 37420                 | 13                    |
| <b>HER2/49M</b>  | 37422                 | 13                    |
| <b>HER2/49Y</b>  | 37422                 | 13                    |
| <b>HER2/50A</b>  | 37424                 | 12                    |
| <b>HER2/50E</b>  | 37418                 | 13                    |
| <b>HER2/50G</b>  | 37426                 | 12                    |
| <b>HER2/50K</b>  | 37419                 | 11                    |
| <b>HER2/50N</b>  | 37423                 | 12                    |
| <b>HER2/50Q</b>  | 37419                 | 12                    |
| <b>HER2/50R</b>  | 37418                 | 11                    |
| <b>HER2/51H</b>  | 37423                 | 13                    |
| <b>HER2/51Y</b>  | 37423                 | 13                    |
| <b>HER2/55A</b>  | 37422                 | 13                    |
| <b>HER2/55F</b>  | 37417                 | 13                    |
| <b>HER2/55M</b>  | 37422                 | 13                    |
| <b>HER2/55P</b>  | 37422                 | 13                    |
| <b>HER2/55V</b>  | 37422                 | 13                    |
| <b>HER2/55W</b>  | 37416                 | 13                    |
| <b>HER2/55Y</b>  | 37417                 | 13                    |
| <b>HER2/56F</b>  | 37417                 | 13                    |
| <b>HER2/56M</b>  | 37420                 | 13                    |
| <b>HER2/56V</b>  | 37421                 | 13                    |
| <b>HER2/56Y</b>  | 37416                 | 13                    |
| <b>HER2/57A</b>  | 37422                 | 13                    |
| <b>HER2/57L</b>  | 37421                 | 13                    |
| <b>HER2/57M</b>  | 37422                 | 13                    |
| <b>HER2/57V</b>  | 37422                 | 13                    |
| <b>HER2/58F</b>  | 37420                 | 13                    |
| <b>HER2/58H</b>  | 37421                 | 13                    |
| <b>HER2/58M</b>  | 37420                 | 13                    |
| <b>HER2/58W</b>  | 37420                 | 13                    |
| <b>HER2/58Y</b>  | 37420                 | 13                    |

|                    |        |    |
|--------------------|--------|----|
| <b>HER2/59K</b>    | 37420  | 12 |
| <b>HER2/59L</b>    | 37422  | 13 |
| <b>HER2/59M</b>    | 37419  | 13 |
| <b>HER2/59R</b>    | 37418  | 12 |
| <b>HER2/59Y</b>    | 37419  | 13 |
| <b>HER2/60W</b>    | 37420  | 13 |
| <b>HER2/61Q</b>    | 37422  | 13 |
| <b>HER2/62F</b>    | 37421  | 13 |
| <b>HER2/62M</b>    | 37421  | 13 |
| <b>HER2/62W</b>    | 37422  | 13 |
| <b>HER2/62Y</b>    | 37421  | 13 |
| <b>HER2/63F</b>    | 36438  | 14 |
| <b>HER2/63M</b>    | 36442  | 14 |
| <b>HER2/63N</b>    | 36443  | 14 |
| <b>HER2/63Q</b>    | 36442  | 14 |
| <b>HER2/63V</b>    | 36443  | 14 |
| <b>HER2/63W</b>    | 36434  | 14 |
| <b>HER2/63A</b>    | 36422  | 14 |
| <b>HER2/63Y</b>    | 36494  | 14 |
| <b>HER2/64K</b>    | 37425  | 12 |
| <b>HER2/64N</b>    | 337425 | 13 |
| <b>HER2/64Q</b>    | 37425  | 13 |
| <b>HER2/64R</b>    | 37425  | 12 |
| <b>HER2/58F63Y</b> | 36493  | 14 |
| <b>HER2/55M56M</b> | 37420  | 13 |
| <b>HER2/55M56Y</b> | 37416  | 13 |
| <b>HER2/55M57A</b> | 37422  | 13 |
| <b>HER2/55M57V</b> | 37422  | 13 |
| <b>HER2/55M58F</b> | 37420  | 13 |
| <b>HER2/55M63V</b> | 36443  | 14 |
| <b>HER2/55M63W</b> | 36434  | 14 |
| <b>HER2/55M63Y</b> | 36494  | 14 |
| <b>HER2/55V56M</b> | 37420  | 13 |
| <b>HER2/55V56Y</b> | 37416  | 13 |
| <b>HER2/55V57A</b> | 37422  | 13 |
| <b>HER2/55V57V</b> | 37422  | 13 |
| <b>HER2/55V58F</b> | 37420  | 13 |
| <b>HER2/55V58H</b> | 37421  | 13 |
| <b>HER2/55V60W</b> | 37420  | 13 |
| <b>HER2/55V63V</b> | 36443  | 14 |

|                    |       |    |
|--------------------|-------|----|
| <b>HER2/55V63W</b> | 36434 | 14 |
| <b>HER2/55V63Y</b> | 36494 | 14 |
| <b>HER2/56M57A</b> | 37420 | 13 |
| <b>HER2/56M57V</b> | 37420 | 13 |
| <b>HER2/56M58F</b> | 37418 | 13 |
| <b>HER2/56M58H</b> | 37419 | 13 |
| <b>HER2/56M60W</b> | 37418 | 13 |
| <b>HER2/56M63V</b> | 36440 | 14 |
| <b>HER2/56M63W</b> | 36431 | 14 |
| <b>HER2/56M63Y</b> | 36490 | 14 |
| <b>HER2/56Y57A</b> | 37416 | 13 |
| <b>HER2/56Y57V</b> | 37416 | 13 |
| <b>HER2/56Y58F</b> | 37414 | 13 |
| <b>HER2/56Y58H</b> | 37415 | 13 |
| <b>HER2/56Y60W</b> | 37414 | 13 |
| <b>HER2/56Y63V</b> | 36438 | 14 |
| <b>HER2/56Y63W</b> | 36429 | 14 |
| <b>HER2/57A58F</b> | 37420 | 13 |
| <b>HER2/57A58H</b> | 37421 | 13 |
| <b>HER2/57A60W</b> | 37420 | 13 |
| <b>HER2/57A63V</b> | 36442 | 14 |
| <b>HER2/57A63W</b> | 36433 | 14 |
| <b>HER2/57A63Y</b> | 36493 | 14 |
| <b>HER2/57V58F</b> | 37420 | 13 |
| <b>HER2/57V58H</b> | 37421 | 13 |
| <b>HER2/57V60W</b> | 37420 | 13 |
| <b>HER2/57V63V</b> | 36442 | 14 |
| <b>HER2/57V63W</b> | 36433 | 14 |
| <b>HER2/57V63Y</b> | 36493 | 14 |
| <b>HER2/58F60W</b> | 37418 | 13 |
| <b>HER2/58F63V</b> | 36442 | 14 |
| <b>HER2/58F63W</b> | 36433 | 14 |
| <b>HER2/58H60W</b> | 37419 | 13 |
| <b>HER2/58H63V</b> | 36444 | 14 |
| <b>HER2/58H63W</b> | 36435 | 14 |
| <b>HER2/58H63Y</b> | 36495 | 14 |
| <b>HER2/60W63V</b> | 36439 | 14 |
| <b>HER2/60W63W</b> | 36430 | 14 |
| <b>HER2/60W63Y</b> | 36491 | 14 |
